# Supplementary material for: Determination of Selenium in Common and Selenium-Rich Rice from Different Areas in China and Assessment of Their Dietary Intake
Source: MDPI journal article supplement (doi:10.3390/ijerph17124596), 2020-06-26
Supplement: s1 [file s1]

**Table S1.** Working parameters of inductively coupled plasma mass spectrometry (ICP-MS).

**Table S2.** The daily rice intake of residents of different gender and age population groups in China.

**Table S3.** Distribution of organic selenium and inorganic selenium in selenium-rich rice ( $\mu\text{g}/100\text{ g}$ , wet weight).

**Figure S1.** Map showing the geographical location and population of ten sampling areas in China where common rice and selenium-rich rice were collected. (Population data came from China's sixth census)

**Table S1. Working parameters of inductively coupled plasma mass spectrometry (ICP-MS).**

| Instrument parameter           | Setting value | Instrument parameter | Setting value    |
|--------------------------------|---------------|----------------------|------------------|
| RF power                       | 1100 W        | Analog voltage       | -1862 V          |
| Atomized gas flow              | 0.89 L/min    | Impulse voltage      | 1310V            |
| Plasma gas flow                | 16.0 L/min    | Scanning mode        | Peaking          |
| Measurement model              | DRC mode      | Scan times           | 20 times         |
| CH <sub>4</sub> flow rate      | 0.8 mL/min    | Reading              | 1 time           |
| Rejection parameter q<br>(RPq) | 0.7           | Times of repetition  | 3 times          |
| Lens voltage                   | 6.8 V         | Detected signal      | <sup>80</sup> Se |

**Table S2. The daily rice intake of residents of different gender and age population groups in China.**

| Age (years) | Daily intake (g/day) |        |
|-------------|----------------------|--------|
|             | Male                 | Female |
| 2-4         | 116.8                | 115.3  |
| 4-7         | 154.9                | 137.5  |
| 7-11        | 199.0                | 182.8  |
| 11-14       | 229.5                | 205.5  |
| 14-18       | 266.1                | 207.5  |
| 18-30       | 266.9                | 224.9  |
| 30-45       | 272.6                | 240.2  |
| 45-60       | 271.5                | 235.2  |
| 60-70       | 236.2                | 209.4  |
| 70-80       | 222.7                | 192.7  |

**Table S3. Distribution of organic selenium and inorganic selenium in selenium-rich rice ( $\mu\text{g}/100\text{ g}$ , wet weight).**

| <b>Number</b> | <b>Total selenium<br/>(<math>\mu\text{g}/100\text{g}</math>)</b> | <b>Organic<br/>selenium<br/>(<math>\mu\text{g}/100\text{g}</math>)</b> | <b>The proportion<br/>of inorganic<br/>selenium (%)</b> | <b>Inorganic<br/>selenium<br/>(<math>\mu\text{g}/100\text{gfw}</math>)</b> | <b>The proportion of<br/>inorganic<br/>selenium (%)</b> |
|---------------|------------------------------------------------------------------|------------------------------------------------------------------------|---------------------------------------------------------|----------------------------------------------------------------------------|---------------------------------------------------------|
| 1             | 4.053                                                            | 2.996                                                                  | 73.93                                                   | 1.057                                                                      | 26.07                                                   |
| 2             | 4.350                                                            | 3.017                                                                  | 69.36                                                   | 1.333                                                                      | 30.64                                                   |
| 3             | 13.385                                                           | 10.487                                                                 | 78.35                                                   | 2.898                                                                      | 21.65                                                   |
| 4             | 6.180                                                            | 4.031                                                                  | 65.23                                                   | 2.149                                                                      | 34.77                                                   |
| 5             | 5.610                                                            | 4.732                                                                  | 84.35                                                   | 0.878                                                                      | 15.65                                                   |
| 6             | 18.455                                                           | 12.821                                                                 | 69.47                                                   | 5.634                                                                      | 30.53                                                   |
| 7             | 10.102                                                           | 8.810                                                                  | 87.21                                                   | 1.292                                                                      | 12.79                                                   |
| 8             | 15.446                                                           | 12.546                                                                 | 81.23                                                   | 2.900                                                                      | 18.78                                                   |
| 9             | 4.613                                                            | 3.941                                                                  | 85.43                                                   | 0.672                                                                      | 14.57                                                   |
| 10            | 5.517                                                            | 4.152                                                                  | 75.26                                                   | 1.365                                                                      | 24.74                                                   |
| 11            | 4.349                                                            | 2.836                                                                  | 65.21                                                   | 1.513                                                                      | 34.79                                                   |
| 12            | 5.907                                                            | 3.682                                                                  | 62.34                                                   | 2.225                                                                      | 37.66                                                   |
| 13            | 18.956                                                           | 16.973                                                                 | 89.54                                                   | 1.983                                                                      | 10.46                                                   |
| 14            | 4.352                                                            | 3.797                                                                  | 87.24                                                   | 0.555                                                                      | 12.76                                                   |
| 15            | 6.350                                                            | 5.568                                                                  | 87.68                                                   | 0.782                                                                      | 12.32                                                   |
| 16            | 13.480                                                           | 11.681                                                                 | 86.65                                                   | 1.799                                                                      | 13.35                                                   |
| 17            | 15.726                                                           | 12.446                                                                 | 79.14                                                   | 3.280                                                                      | 20.86                                                   |
| 18            | 5.540                                                            | 4.417                                                                  | 79.73                                                   | 1.123                                                                      | 20.28                                                   |
| 19            | 10.196                                                           | 6.958                                                                  | 68.24                                                   | 3.238                                                                      | 31.76                                                   |
| 20            | 15.230                                                           | 13.144                                                                 | 86.31                                                   | 2.086                                                                      | 13.70                                                   |

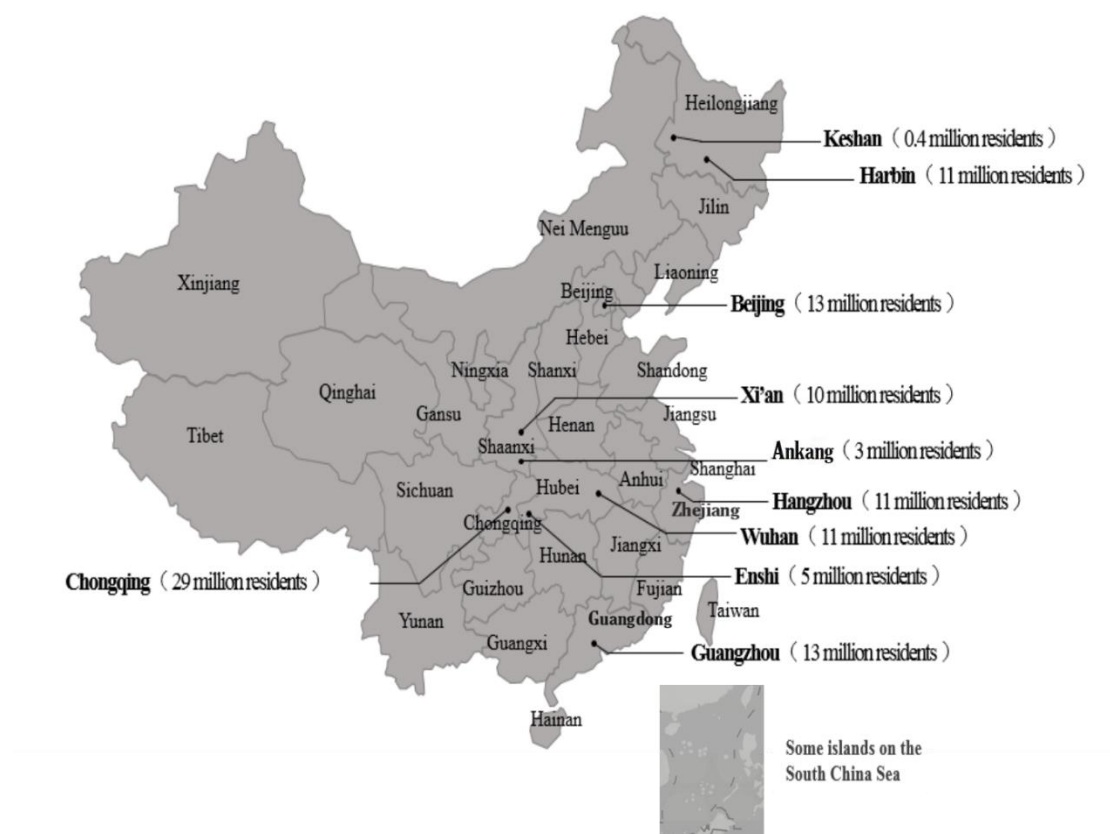

**Figure S1. Map showing the geographical location and population of ten sampling areas in China where common rice and selenium-rich rice were collected. (Population data came from China's sixth census)**
